# Supplementary material for: Assimilation of chitin with tin for defluoridation of water
Source: Royal Society of Chemistry journal article supplement (doi:10.1039/c6ra00014b), 2016-01-01

Supplementary Fig. 1 Plot of  $q_e$  against  $C_e$ .

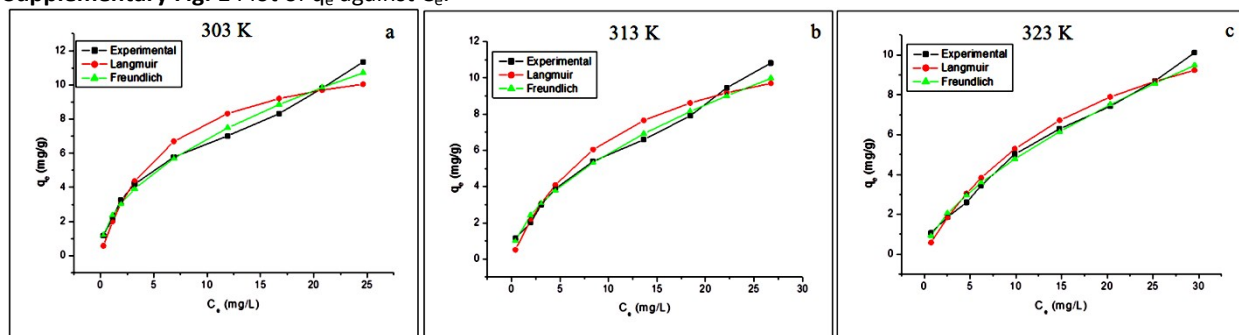

Supplementary Fig. 2 Pseudo-first-order kinetics.

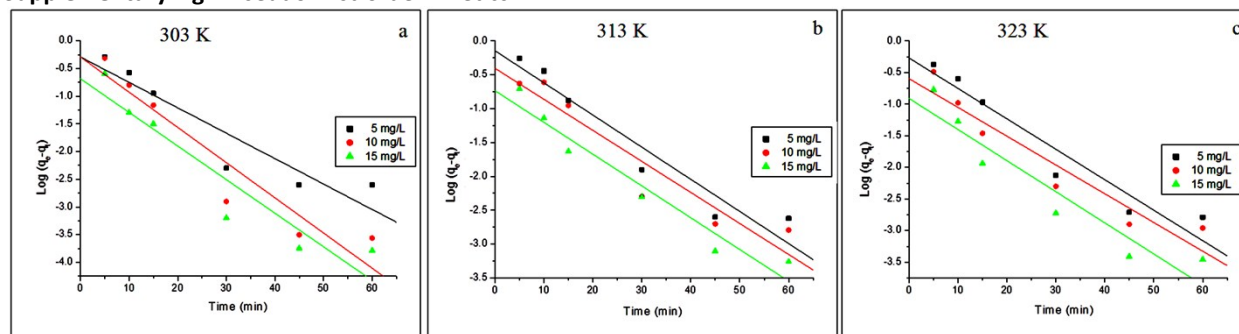

Supplementary Fig. 3 Pseudo-second-order kinetics.

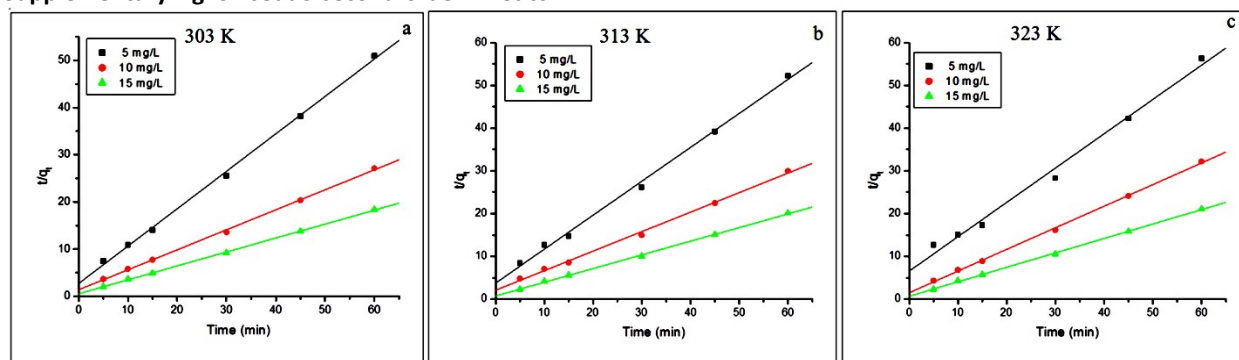

Supplementary Fig. 4 Intraparticle diffusion.

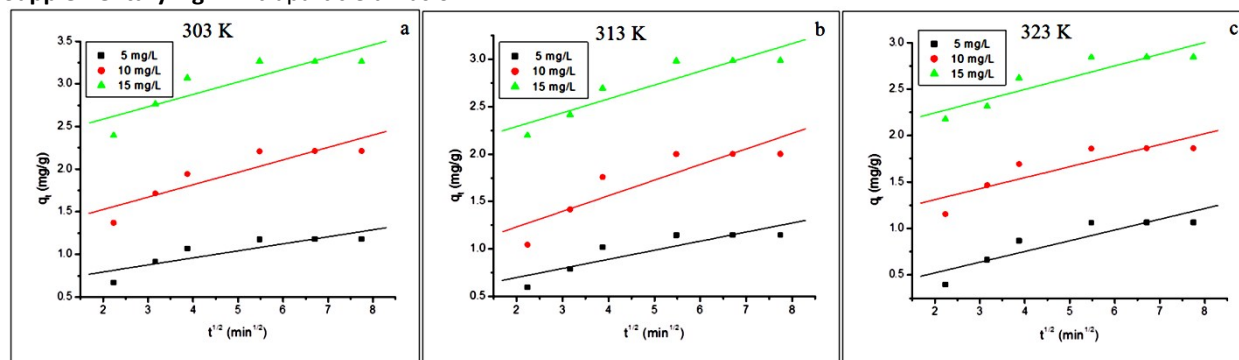

Supplement: c6ra00014b1.pdf [file c6ra00014b1.pdf]
